# Supplementary material
Source: PubMed Central journal article supplement (PMC6954299)
Supplement: NIHMS1541060-supplement-1.pdf [file NIHMS1541060-supplement-1.pdf]

## Supplementary Fig. S1

### A Most common genetic alterations in PDA (TCGA):

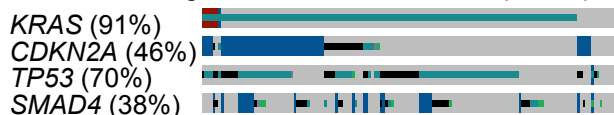

### TGF- $\beta$ core pathway alterations in PDA (TCGA):

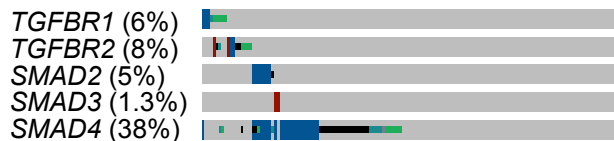

### Most common genetic alterations in PDA (UTSW):

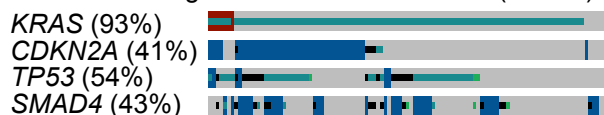

### TGF- $\beta$ core pathway alterations in PDA (UTSW):

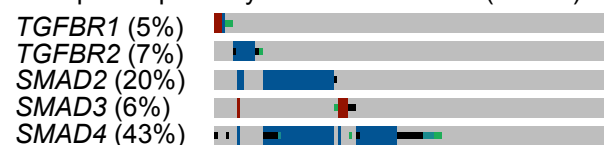

Genetic Alteration: ■ Amplification ■ Deep Deletion ■ Truncating Mutation ■ Missense Mutation (likely driver) ■ Missense Mutation (likely passenger)

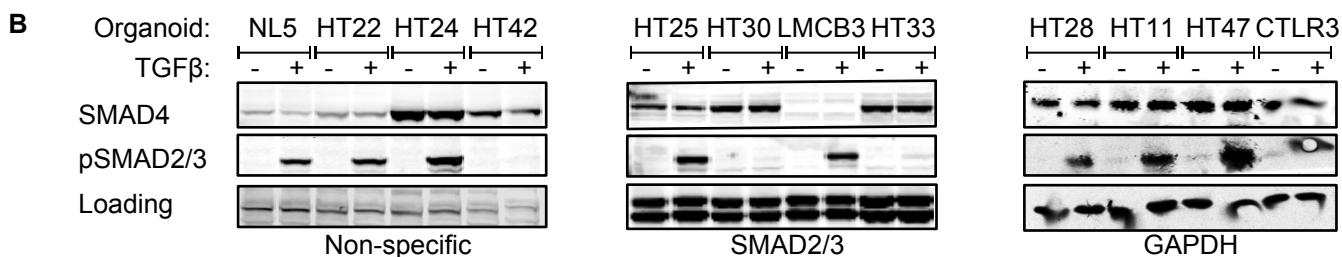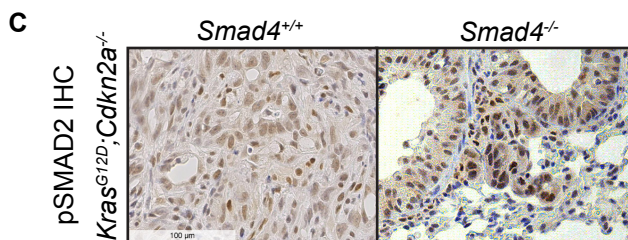

### D

|                |              |               |               |                |
|----------------|--------------|---------------|---------------|----------------|
| <i>AHR</i>     | <i>FOS</i>   | <i>JUND</i>   | <i>NKX2-2</i> | <i>STAT1</i>   |
| <i>ATF4</i>    | <i>FOSB</i>  | <i>KLF13</i>  | <i>NKX6-3</i> | <i>STAT2</i>   |
| <i>BCL6</i>    | <i>HIF1A</i> | <i>KLF5</i>   | <i>NPAS2</i>  | <i>STAT3</i>   |
| <i>BHLHA15</i> | <i>HMGA1</i> | <i>KLF6</i>   | <i>NR4A1</i>  | <i>STAT6</i>   |
| <i>BHLHE40</i> | <i>HMGB1</i> | <i>MAFB</i>   | <i>NR5A2</i>  | <i>TFDP1</i>   |
| <i>BPTF</i>    | <i>HMGB2</i> | <i>MAZ</i>    | <i>PAX6</i>   | <i>TSC22D1</i> |
| <i>CREB3L1</i> | <i>HMGB3</i> | <i>MEF2A</i>  | <i>PEG3</i>   | <i>TSC22D3</i> |
| <i>DMTF1</i>   | <i>HSF4</i>  | <i>MEIS1</i>  | <i>PPARG</i>  | <i>TSHZ3</i>   |
| <i>DRAP1</i>   | <i>ID1</i>   | <i>MEIS2</i>  | <i>PRRX1</i>  | <i>XBP1</i>    |
| <i>EGR1</i>    | <i>ID2</i>   | <i>MLXIP</i>  | <i>RBPJ</i>   | <i>ZBTB16</i>  |
| <i>EHF</i>     | <i>ID3</i>   | <i>MLXIPL</i> | <i>RBPJL</i>  | <i>ZBTB38</i>  |
| <i>ELF1</i>    | <i>ISL1</i>  | <i>MYC</i>    | <i>RUNX1</i>  |                |
| <i>ELF3</i>    | <i>JUN</i>   | <i>NFE2L1</i> | <i>SREBF2</i> |                |
| <i>EPAS1</i>   | <i>JUNB</i>  | <i>NFIC</i>   | <i>ST18</i>   |                |

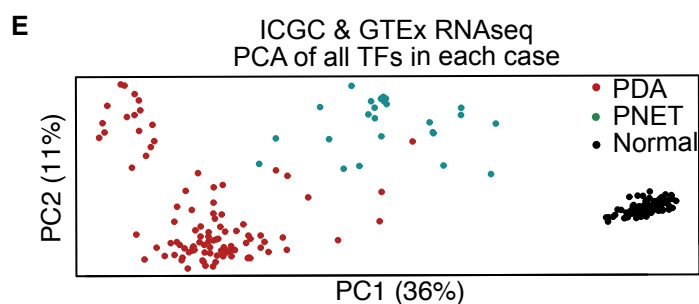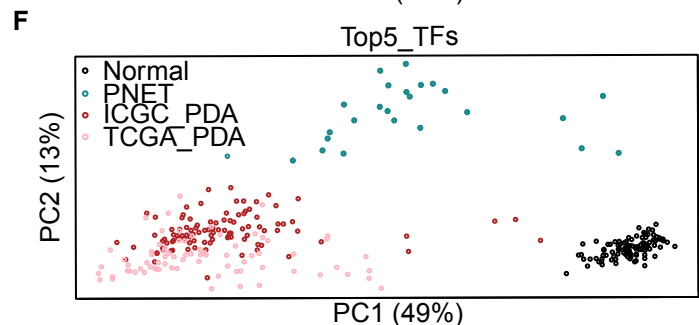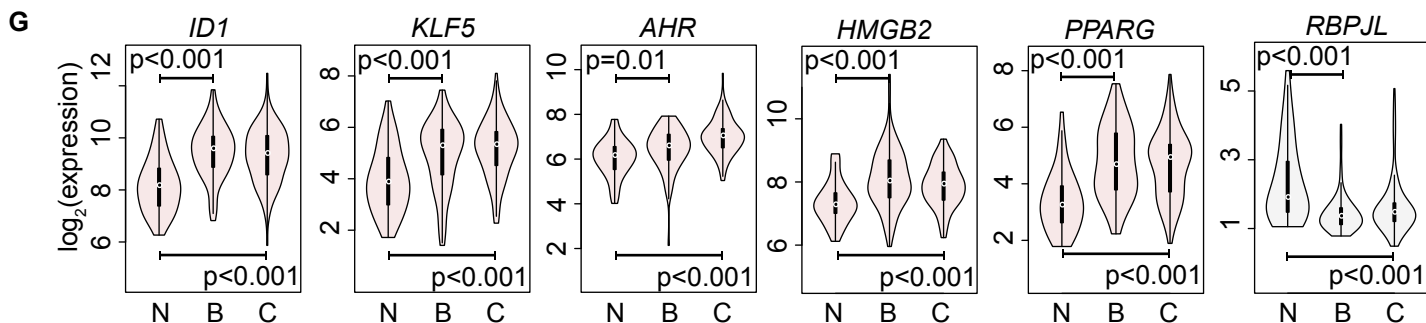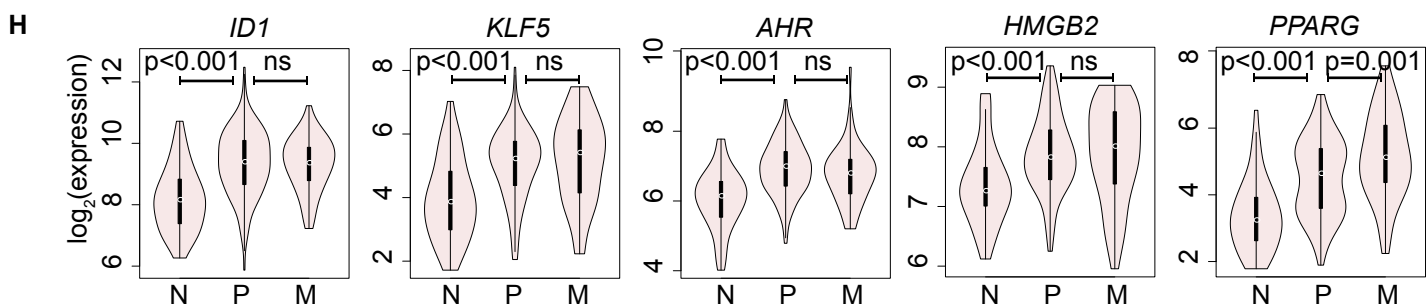

### **Supplementary Fig. S1: TGF- $\beta$ signaling and transcriptional networks in PDA**

A) cBioportal oncoprints of common genetic alterations and TGF- $\beta$  pathway alterations in PDA. Each column represents one case.

B) Western immunoblot analysis of pSMAD2 and SMAD4 in human PDA organoids treated with or without 100 pM TGF- $\beta$  for 2h.

C) pSMAD2 immunohistochemistry (IHC) of mouse *Kras*<sup>G12D</sup>;*Cdkn2a*<sup>-/-</sup> PDA in the pancreas (*right*) and *Kras*<sup>G12D</sup>;*Cdkn2a*<sup>-/-</sup>;*Smad4*<sup>-/-</sup> PDA metastasis in the lung (*left*).

D) Genes represented within the top 5 expressed transcription factors of at least one sample in 225 samples of normal pancreas, PNET, and PDA.

E) PCA of GTEx and ICGC RNA-seq datasets from using the complete list of transcription factors expressed in these samples.

F) PCA of GTEx, ICGC, and TCGA RNA-seq datasets using the gene set in Supplementary Fig. S1D.

G) GEO2R analysis of the expression of the top PDA-enriched PC1 genes (refer to Figure 1E) in the pancreatic microarray dataset GSE71729. N=Normal pancreas, B=Basal PDA, C=Classical PDA. p-values are from two-sided, unpaired t-tests of B versus N, and C versus N.

H) GEO2R analysis of the expression of PDA-enriched PC1 genes in pancreatic microarray dataset GSE71729. N=Normal pancreas, P=Primary PDA tumor, M=Metastasis of PDA. P-values from two-sided, unpaired t-tests of P versus N, and M versus P.
