# Supplementary material
Source: PubMed Central journal article supplement (PMC6954299)
Supplement: NIHMS1541060-supplement-2.pdf [file NIHMS1541060-supplement-2.pdf]

Supplementary Fig. S2

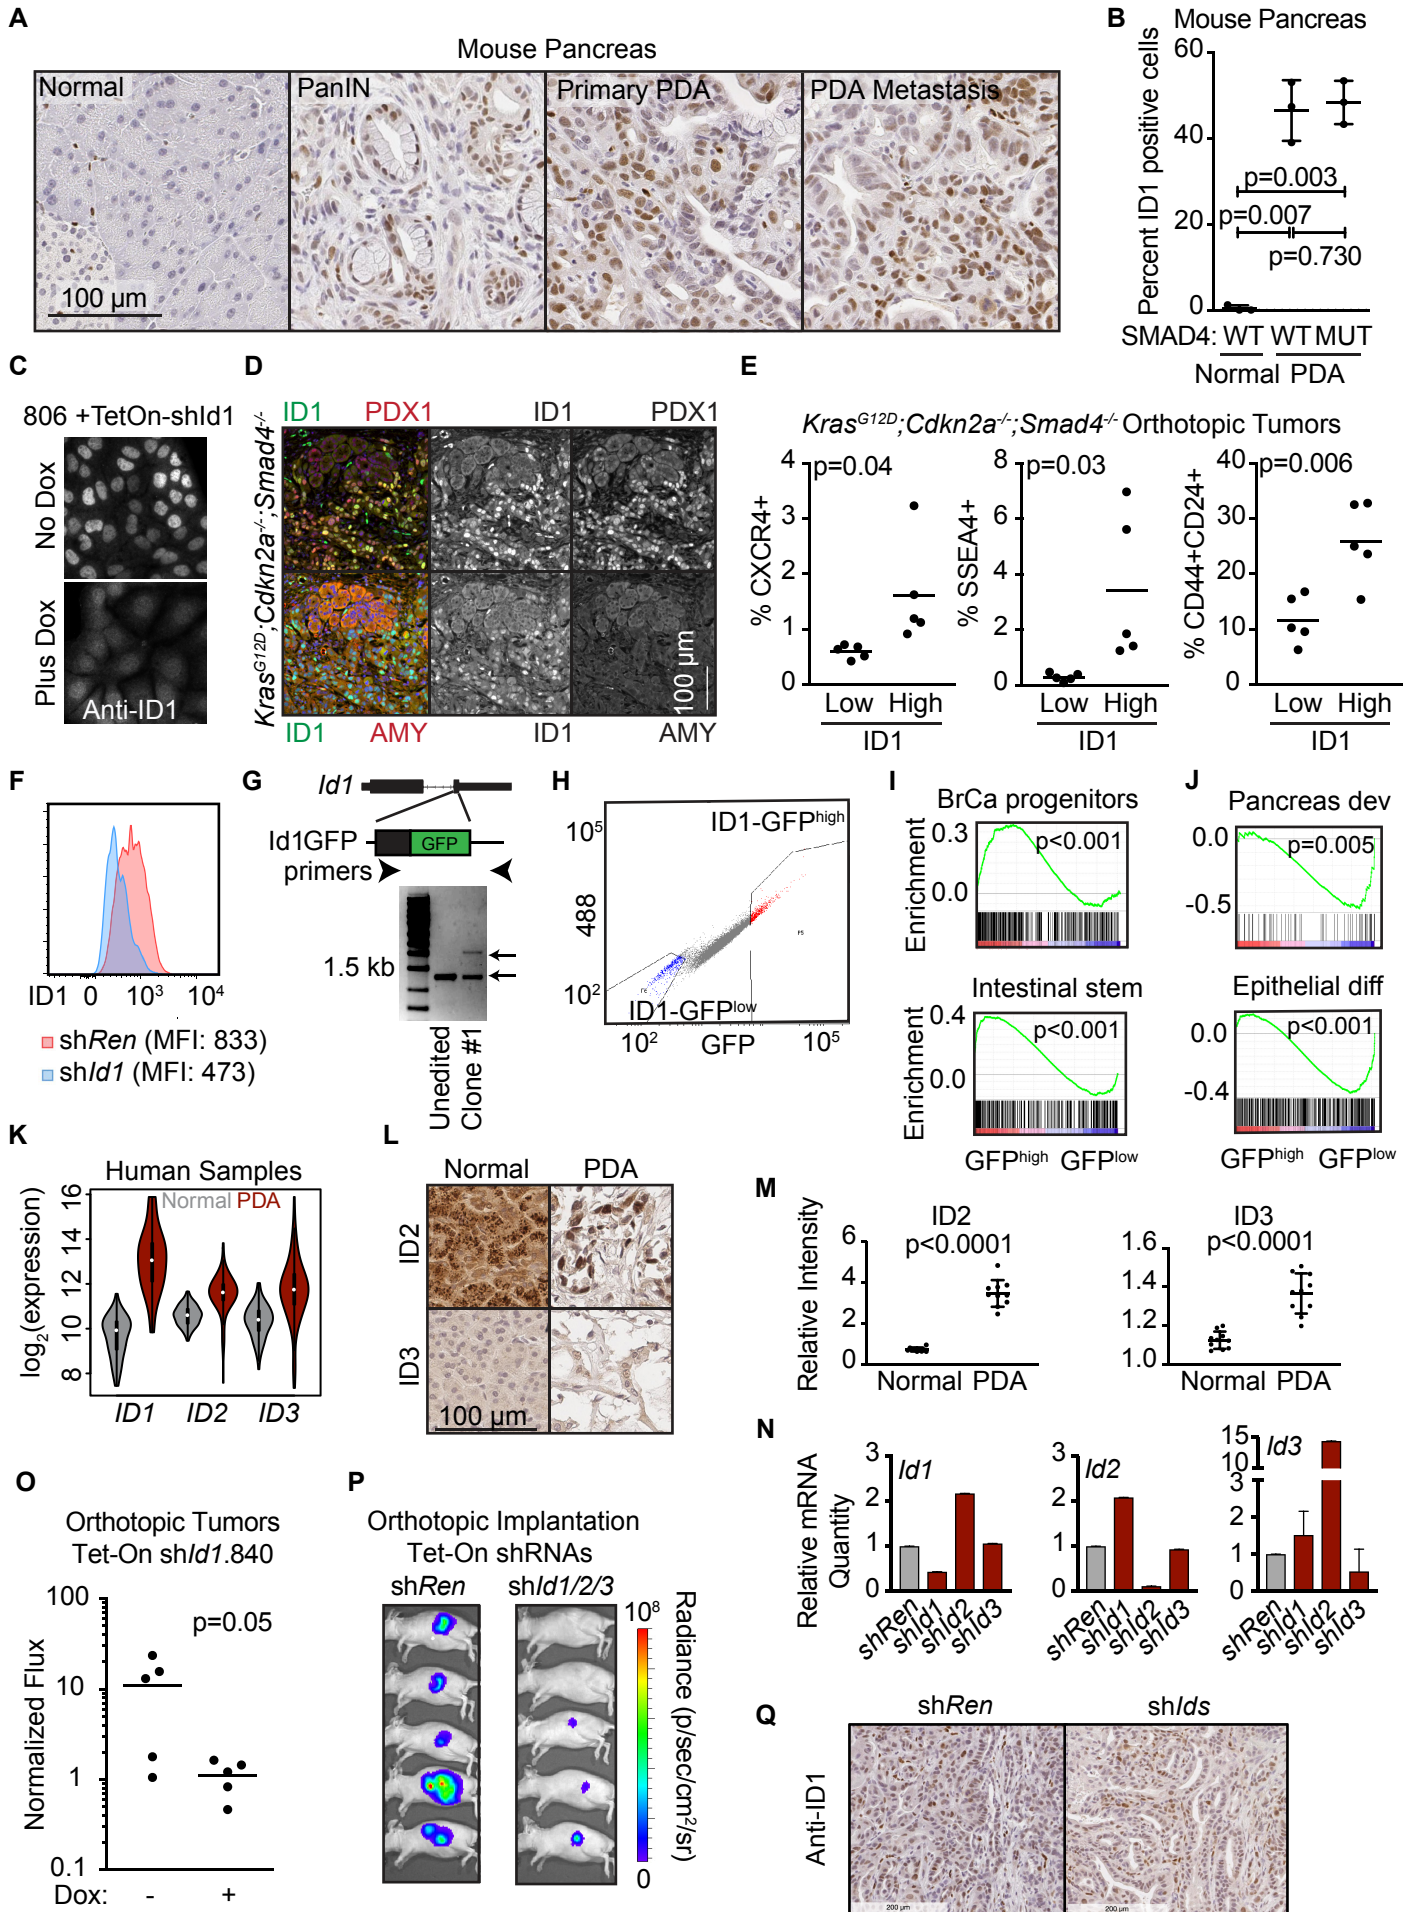

## Supplementary Fig. S2: ID1 expression and effects in PDA progenitors

- A) Representative samples of mouse normal pancreas, PanIN, primary PDA, and PDA metastasis subjected to ID1 IHC analysis.
- B) Quantification of ID1+ epithelial cells in mouse PDA tissues as determined by IHC. n=3 per group, two-sided unpaired t-tests.
- C) *Kras*<sup>G12D</sup>;*Cdkn2a*<sup>-/-</sup>;*Smad4*<sup>-/-</sup> mouse PDA cells with a doxycycline-inducible shRNA targeting *Id1* were subjected to anti-ID1 immunofluorescence staining.
- D) Immunofluorescence analysis of ID1 and amylase (AMY) in autochthonous *Kras*<sup>G12D</sup>;*Cdkn2a*<sup>-/-</sup>;*Smad4*<sup>-/-</sup> mouse PDA tissue.
- E) Orthotopically-implanted *Kras*<sup>G12D</sup>;*Cdkn2a*<sup>-/-</sup>;*Smad4*<sup>-/-</sup> mouse tumors were dissociated and analyzed by flow cytometry. Cytokeratin 19 (CK19) was used to distinguish PDA cells from stromal cells. The ID1-low and ID1-high components of CK19+ population were analyzed for the indicated markers. n=5 mice.
- F) Flow cytometry analysis of anti-ID1 staining control of *Kras*<sup>G12D</sup>;*Cdkn2a*<sup>-/-</sup>;*Smad4*<sup>-/-</sup> mouse PDA cells engineered with a Tet-ON-*shId1* construct. MFI, mean fluorescence intensity.
- G) An ID1-GFP reporter was constructed using CRISPR/Cas9 to insert *green fluorescent protein* fused to the 3' end of *Id1* coding region in the endogenous locus in *Kras*<sup>G12D</sup>;*Cdkn2a*<sup>-/-</sup>;*Smad4*<sup>-/-</sup> mouse PDA cells, as verified by PCR analysis.
- H) Flow cytometry sorting for ID1-GFP<sup>high</sup> and ID1-GFP<sup>low</sup> cells. The overlapping spectra of Alexa 488 and GFP were used for better graphic separation of the cell populations.
- I,J) ID1-GFP<sup>high</sup> and ID1-GFP<sup>low</sup> cells were collected for RNA-seq. Differentially expressed genes were determined by DESeq2 and ranked by fold change in expression for GSEA. n=2 per group.
- K) Analysis of RNA-seq data from the human pancreas samples described in Figure 1E.
- L) IHC of the human PDA samples characterized in Figure 2B.
- M) Quantitative scoring of ID1 and ID3 IHC staining in human PDA samples characterized in Figure 2A.
- N) qRT-PCR analysis of *Id1-3* transcripts in *Kras*<sup>G12D</sup>;*Cdkn2a*<sup>-/-</sup>;*Smad4*<sup>-/-</sup> mouse PDA cells engineered with Tet-ON shRNAs targeting individual *Id* genes. Mean ± range, representative of 2 independent experiments.
- O) Mice were treated with doxycycline from 3 days after orthotopic implantation of *Kras*<sup>G12D</sup>;*Cdkn2a*<sup>-/-</sup>;*Smad4*<sup>-/-</sup> PDA cells engineered with a Tet-ON-*shId1* construct. BLI measurements were done 2 weeks post-implantation. Two-tailed unpaired t-test, n=5 per group.
- P) Bioluminescent measurements of orthotopically implanted *Kras*<sup>G12D</sup>;*Cdkn2a*<sup>-/-</sup>;*Smad4*<sup>-/-</sup> PDA cells at 4 weeks post-implantation. Quantified in Figure 2H.
- Q) IHC for ID1 in tumors collected from orthotopic implantation assays at endpoint.
