# Supplementary material
Source: PubMed Central journal article supplement (PMC6954299)
Supplement: NIHMS1541060-supplement-3.pdf [file NIHMS1541060-supplement-3.pdf]

### Supplementary Fig. S3

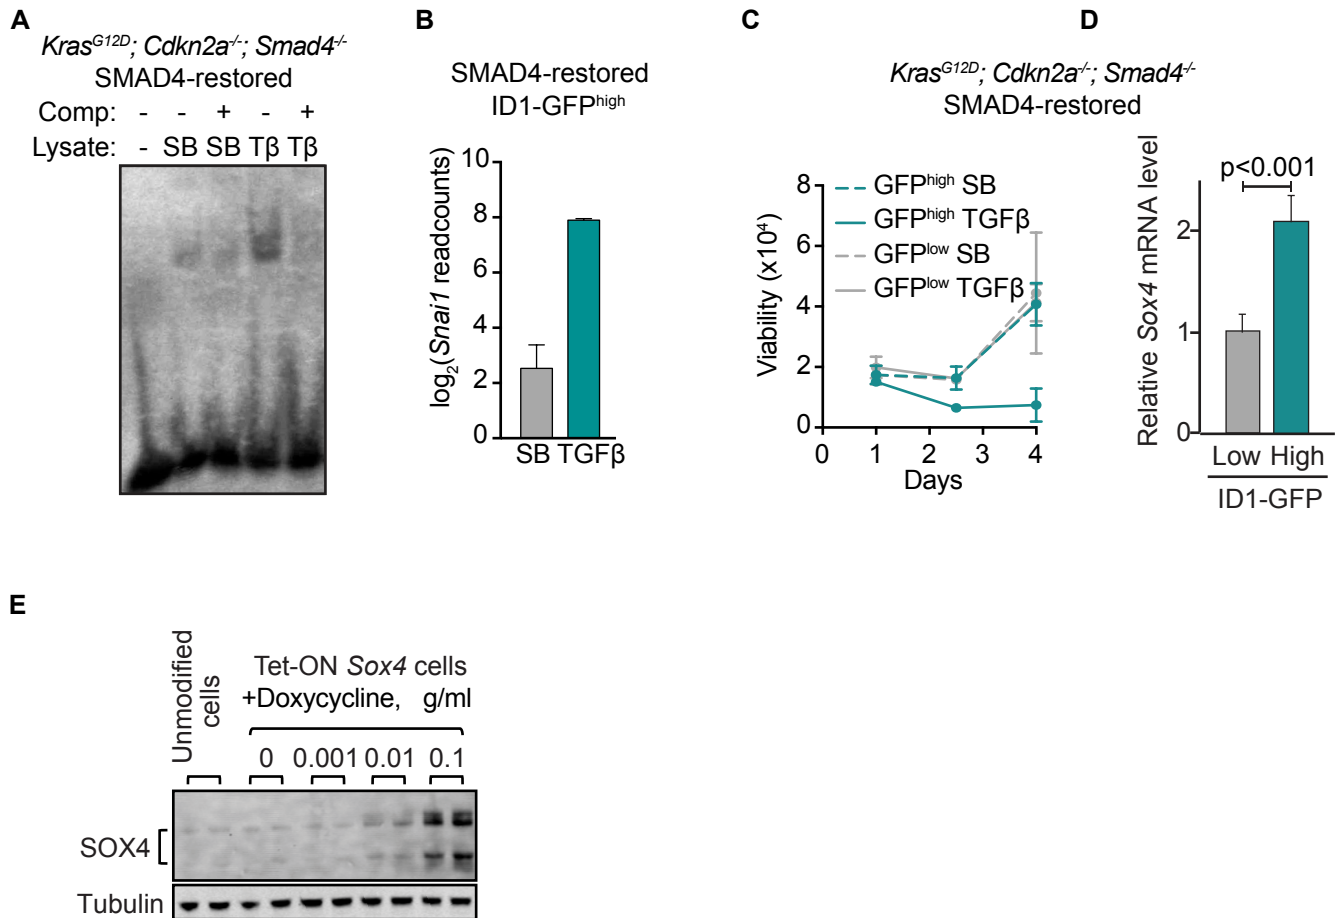

### Supplementary Fig. S3: ID1 downregulation is associated with apoptosis

A) EMSA of SMAD4-restored mouse PDA cell extracts on an E-box dsDNA oligonucleotide. Cells were treated with 2.5 μM SB or 100 pM TGF-β for 6h. Excess unlabeled oligonucleotide probe was used to determine specificity.

B) *Snai1* mRNA levels in RNA-seq analysis of SMAD4-restored mouse PDA cells with high expression of a ID1-GFP reporter. Mean±SD, n=2.

C) Cell viability of sorted ID1-GFP<sup>low</sup> and ID1-GFP<sup>high</sup> SMAD4-restored mouse PDA cells, as determined by CellTiter Glo.

D) *Kras<sup>G12D</sup>; Cdkn2a<sup>-/-</sup>; Smad4<sup>-/-</sup>* mouse PDA cells containing an endogenous ID1-GFP reporter were sorted into GFP<sup>low</sup> (bottom 5%) and GFP<sup>high</sup> (top 5%) cells followed by RNA extraction and qRT-PCR analysis of *Sox4* mRNA levels. Two-sided unpaired t-test.

E) SMAD4-restored mouse PDA cells with the ID1-GFP reporter were transduced with a Tet-On *Sox4* vector, sorted for low GFP expression and treated with the indicated concentrations of doxycycline for 12h. Samples were subjected to western immunoblotting with anti-SOX4 and anti-tubulin antibodies.
