# Supplementary material
Source: PubMed Central journal article supplement (PMC6954299)
Supplement: NIHMS1541060-supplement-4.pdf [file NIHMS1541060-supplement-4.pdf]

**Supplementary Fig. S4**

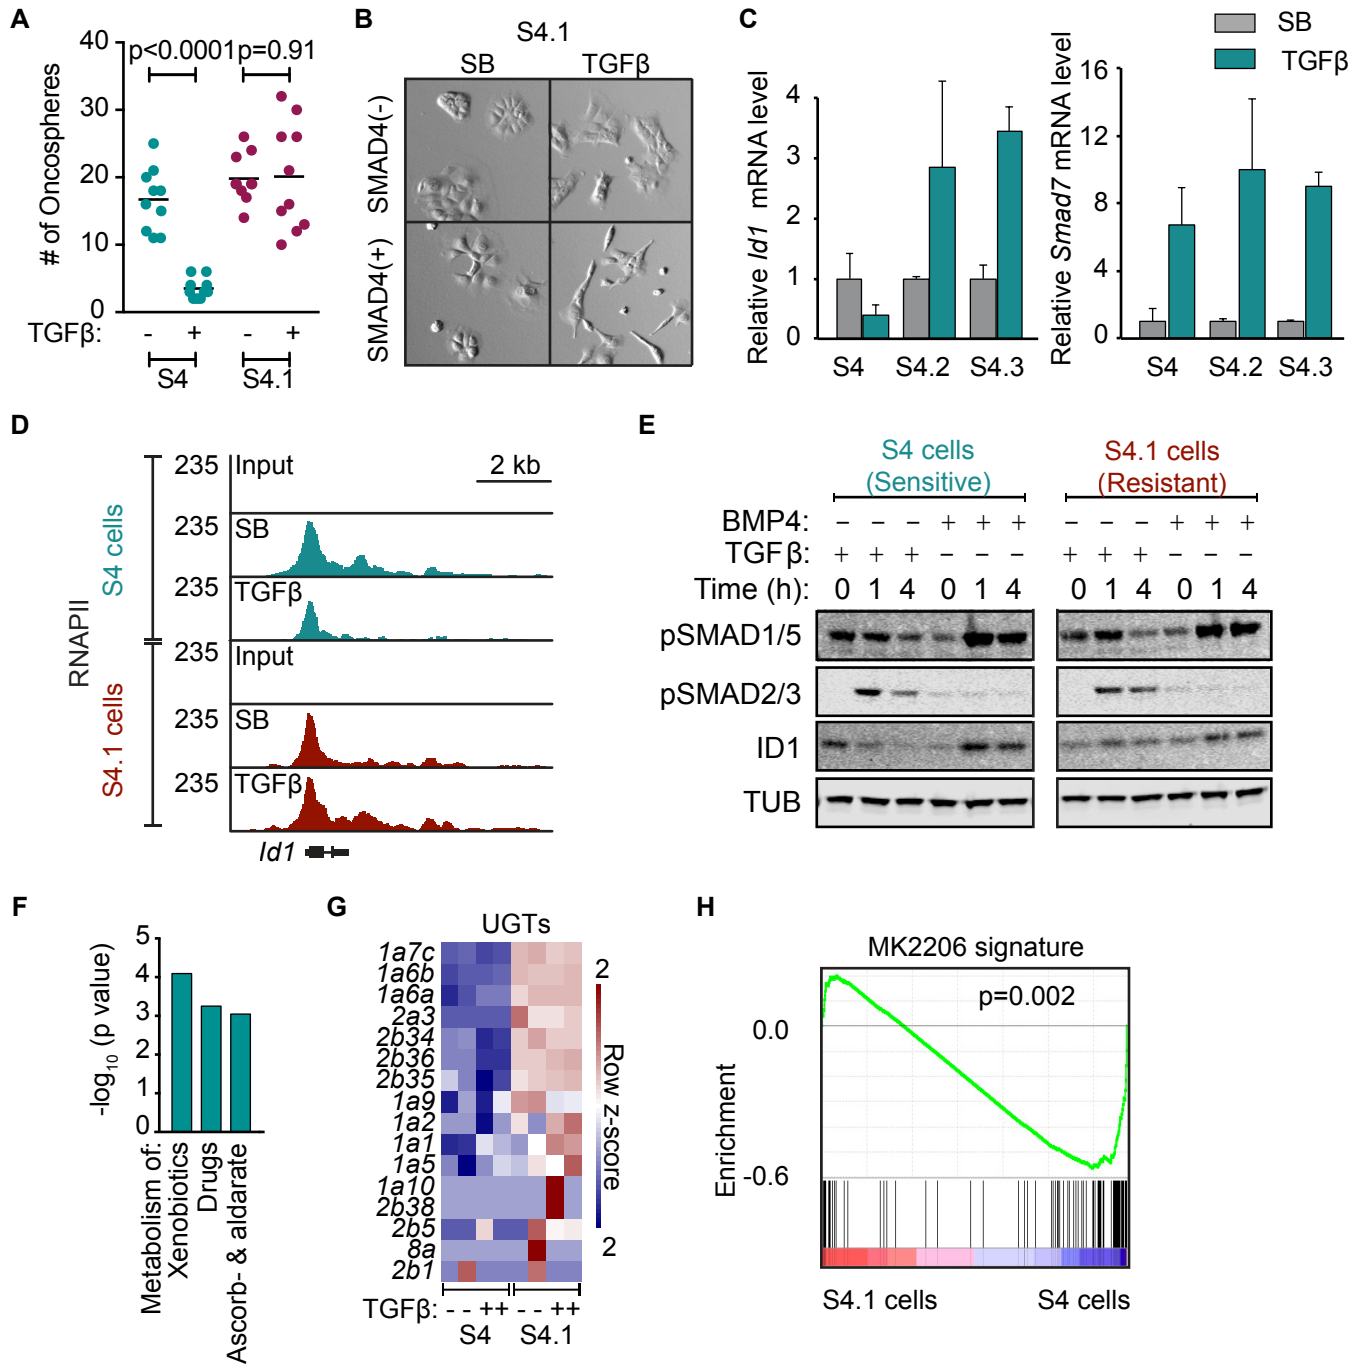

**Supplementary Fig. S4: Dysregulated ID1 expression in PDAs with a functional TGF- $\beta$  pathway**

- A) SMAD4-restored *Kras*<sup>G12D</sup>; *Cdkn2a*<sup>-/-</sup>; *Smad4*<sup>-/-</sup> mouse PDA cells (S4) and resistant populations selected as described in Figure 4G (S4.1) were plated in spheroid-forming conditions and treated with 2.5  $\mu$ M SB505124 or 100 pM TGF- $\beta$  for 7 days and counted.
- B) Resistant populations with Tet-ON-SMAD4 were selected as described in Figure 4G (S4.1). Cells were plated with or without doxycycline for 12h and then treated with 2.5  $\mu$ M SB505124 or 100 pM TGF- $\beta$  for 24h. Microscopy at 48h.
- C) SMAD4-restored *Kras*<sup>G12D</sup>; *Cdkn2a*<sup>-/-</sup>; *Smad4*<sup>-/-</sup> mouse PDA cells (S4) and resistant populations selected as described in Figure 4G (S4.1) were treated with 2.5  $\mu$ M SB505124 or 100 pM TGF- $\beta$  for 1.5 h and collected for qRT-PCR.
- D) S4 and S4.1 cells were treated with 2.5  $\mu$ M SB505124 or 100 pM TGF- $\beta$  for 1.5 h and subjected to RNAPII ChIP-seq. Shown are gene track views of RNAPII tags at the *Id1* locus.
- E) S4 and S4.1 cells were treated with 100 pM TGF- $\beta$  or 800 pM BMP4 for the indicated times and subjected to immunoblotting for the indicated proteins.
- F) Pathway signature analysis of differentially expressed genes in RNA-seq datasets from S4 and S4.1 cells.
- G) mRNA expression levels of UDP glucuronosyltransferase (UGT) family members in S4 and S4.1 RNA-seq datasets.
- H) GSEA analysis of the MK2206 signature in S4 and S4.1 RNA-seq datasets.
