# Supplementary material
Source: PubMed Central journal article supplement (PMC6954299)
Supplement: NIHMS1541060-supplement-6.pdf [file NIHMS1541060-supplement-6.pdf]

**Figure S6**

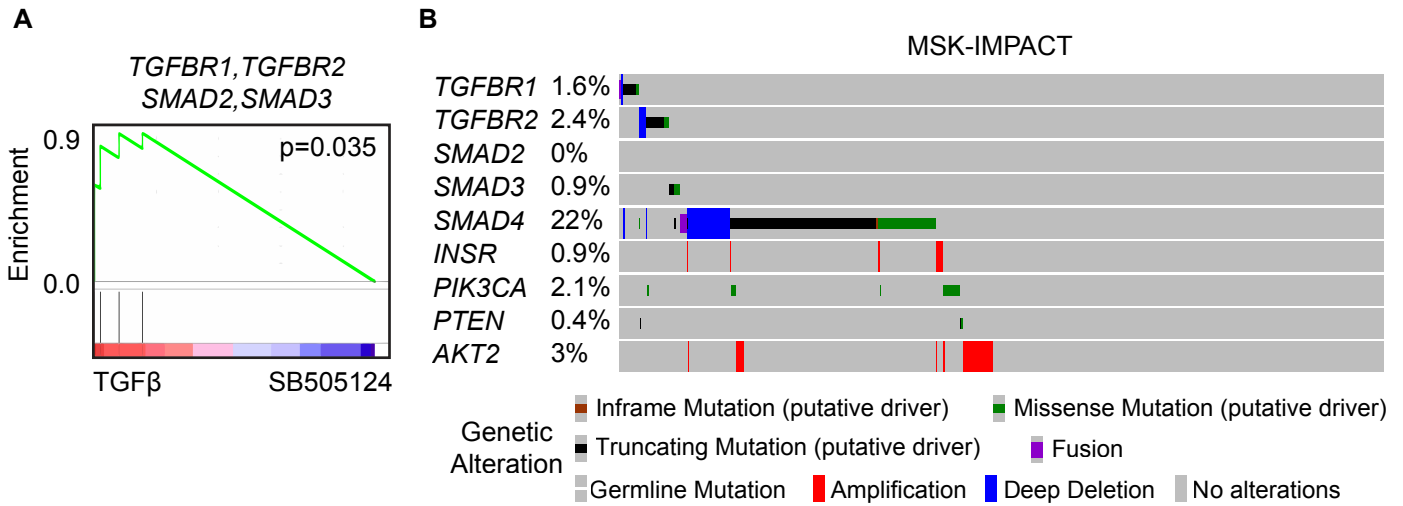

**Supplementary Fig. S6: Mediators of ID1 dysregulation in PDA**

A) Genes enriched in the genome-wide screen were ranked by direction \* p-value and gene set enrichment analysis was performed for TGF- $\beta$  pathway members.

B) cBioportal oncoprint of MSK-IMPACT alterations in the TGF- $\beta$  and PI3K/AKT pathways in 1013 cases of PDA. Each column represents one case of PDA, hypermutated cases are not shown.
