# Supplementary material
Source: PubMed Central journal article supplement (PMC6954299)
Supplement: NIHMS1541060-supplement-9.pdf [file NIHMS1541060-supplement-9.pdf]

**Supplementary Table S1**

| <b>Organoid</b> | <b>KRAS</b> | <b>TP53</b>  | <b>TGFBR2</b> |
|-----------------|-------------|--------------|---------------|
| HT30            | Q61H        | V122Dfs*26   | N179Ifs*10    |
| HT24            | G12V        | ---          | R485H         |
| HT33            | G12V        | ---          | P154Afs*3     |
| LMCB3           | G12V        | G244S        | E579Gfs*5     |
| HT22            | G12D        | R248W, R213* | ---           |
| NL5             | G12D        | ---          | ---           |
| HT28            | G12D        | P128Lfs*42   | ---           |
| HT25            | G12D        | R213*        | ---           |
| HT47            | G12V        | ---          | ---           |
| HT42            | G12V        | R175H        | ---           |
| HT11            | G12V        | R213*        | ---           |
| CTLR3           | G12V        | R282W        | ---           |

**Supplementary Table S1.** *KRAS*, *TP53* and *TGFBR2* mutations status of twelve human PDA organoids  
*TGFR2* mutation E579Gfs\*5 detected in organoid LMCB3 is unlikely to have functional impact
