# Supplementary material
Source: PubMed Central journal article supplement (PMC6954299)
Supplement: NIHMS1541060-supplement-10.pdf [file NIHMS1541060-supplement-10.pdf]

**Supplementary Table S2**

| Case          | Diagnosis | Tumor differentiation | Tumor location in pancreas | SMAS4 IHC | ID1–KLF5–SOX4– | ID1–KLF5+SOX4– | ID1–KLF5–SOX4+ | ID1–KLF5+SOX4+ | ID1+KLF5–SOX4– | ID1+KLF5+SOX4– | ID1+KLF5–SOX4+ | ID1+KLF5+SOX4+ |
|---------------|-----------|-----------------------|----------------------------|-----------|----------------|----------------|----------------|----------------|----------------|----------------|----------------|----------------|
| 1             | PDAC      | Poor                  | Head                       | negative  | 1.47%          | 0.57%          | 12.26%         | 6.00%          | 47.78%         | 13.02%         | 5.16%          | 13.19%         |
| 2             | PDAC      | Moderate              | Head                       | positive  | 17.11%         | 32.53%         | 0.63%          | 14.19%         | 12.09%         | 15.64%         | 5.30%          | 2.52%          |
| 3             | PDAC      | Moderate              | Body and tail              | negative  | 31.07%         | 12.86%         | 3.72%          | 9.21%          | 17.17%         | 15.81%         | 4.83%          | 5.34%          |
| 4             | PDAC      | Moderate to poor      | Head                       | positive  | 21.68%         | 40.18%         | 0.61%          | 25.21%         | 0.79%          | 1.09%          | 10.21%         | 0.23%          |
| 5             | PDAC      | Moderate              | Head                       | negative  | 7.62%          | 14.55%         | 3.75%          | 30.00%         | 7.07%          | 16.83%         | 11.79%         | 8.68%          |
| 6             | PDAC      | Moderate              | Head                       | positive  | 15.71%         | 14.49%         | 2.06%          | 5.51%          | 17.86%         | 36.17%         | 4.90%          | 3.30%          |
| <b>Mean</b>   |           |                       |                            |           | 15.77%         | 19.20%         | 3.84%          | 15.02%         | 17.13%         | 16.43%         | 7.03%          | 5.54%          |
| <b>Median</b> |           |                       |                            |           | 16.41%         | 14.52%         | 2.89%          | 11.70%         | 14.63%         | 15.72%         | 5.23%          | 4.32%          |
| <b>Min</b>    |           |                       |                            |           | 1.47%          | 0.57%          | 0.61%          | 5.51%          | 0.79%          | 1.09%          | 4.83%          | 0.23%          |
| <b>Max</b>    |           |                       |                            |           | 31.07%         | 40.18%         | 12.26%         | 30.00%         | 47.78%         | 36.17%         | 11.79%         | 13.19%         |

**Supplementary Table S2.** Six surgically resected formalin-fixed and paraffin-embedded PDA samples collected within the past year and scored for SMAD4 by IHC were subjected to multiplex IHC for ID1, KLF5, SOX4 and pan-cytokeratin. We scored a total of 49,639 cells across the 6 samples (5,212-12,371 cells per sample).
